# Supplementary material for: The Association between ANXA2 mutations and Clinical Pathological Features in Patients with Breast Cancer
Source: Research Square preprint supplement (doi:10.21203/rs.3.rs-403277/v1), 2021-04-12
Supplement: Supplementary file 1 [file 4254d29e7a592a52b2485889.docx]

| Factors | B | SE | Wald | df | P-value | Exp(B) | 95.0% CI |
| --- | --- | --- | --- | --- | --- | --- | --- |
| Lymph node Metastasis | 1.932 | 0.431 | 20.057 | 1 | <0.001 | 6.904 | 2.964~16.802 |
| PR | 0.795 | 0.379 | 4.400 | 1 | 0.036 | 2.215 | 1.054~4.658 |
| Missense mutations | -0.974 | .373 | 6.836 | 1 | 0.009 | 0.378 | 0.182~0.784 |

Table 6. Multivariable Cox proportional risk regression model analysis for 5-year overall survival rate.

P-value <0.05, statistically significant.
